# Supplementary material
Source: PubMed Central journal article supplement (PMC4068609)
Supplement: NIHMS581582-supplement-Sup-Fig-1.pdf [file NIHMS581582-supplement-Sup-Fig-1.pdf]

# Supplementary Figure 1

Vorinostat ( $\mu\text{M}$ )

DMSO

2

5

10

20

Primary GBM

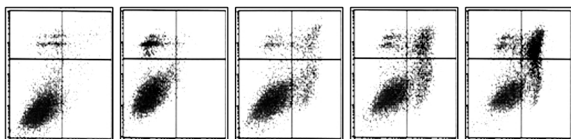

T98G

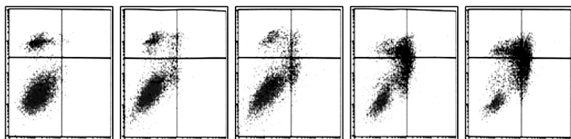

NHA

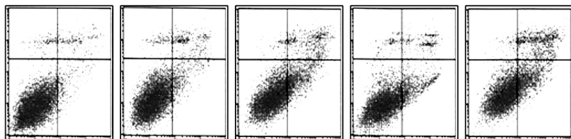

Annexin V-FITC fluorescence

Primary GBM

ns

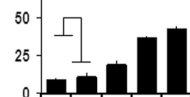

Apoptotic cells (%)

T98G

ns

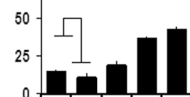

NHA

ns

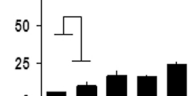

0 2 5 10 20

Vorinostat ( $\mu\text{M}$ )
